# Supplementary material
Source: PubMed Central journal article supplement (PMC1464573)
Supplement: NIHMS4990-supplement-sup3.pdf [file NIHMS4990-supplement-sup3.pdf]

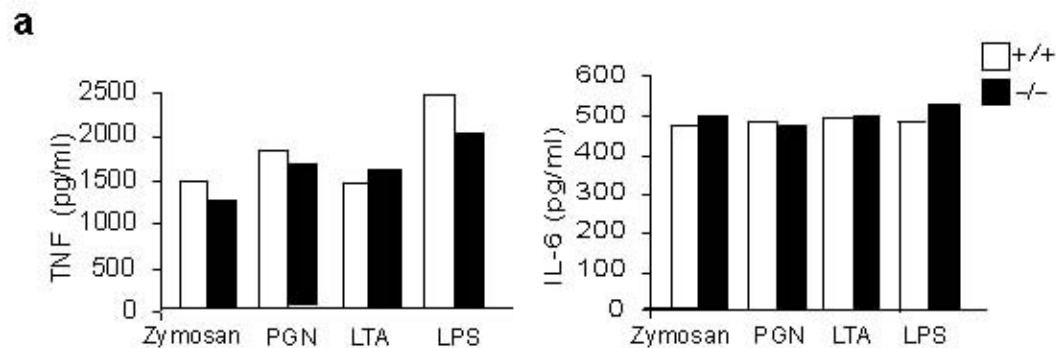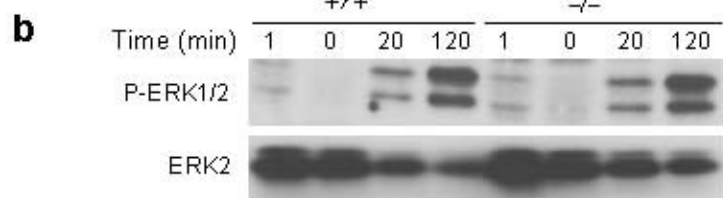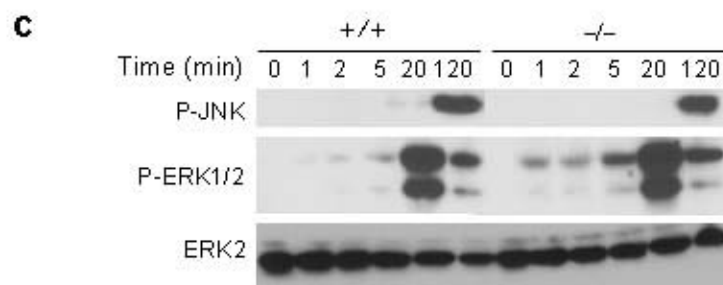

**Supplemental Figure 2** Activation of CAPRI-deficient macrophages by PAMPs and bacteria. **(a)** Cytokine production by CAPRI-deficient macrophages after PAMPs stimulation. Elicited peritoneal macrophages from CAPRI-deficient (-/-) and control mice (+/+) were stimulated with zymosan (100  $\mu$ g/ml), PGN (100  $\mu$ g/ml), LTA (10  $\mu$ g/ml) and LPS (10 ng/ml) for 16 hr and tested for TNF and IL-6 production. Data are representative of 4 experiments. **(b)** and **(c)** Activation of signaling proteins in CAPRI-deficient macrophages after stimulation with whole bacteria. Macrophages stimulated with heat-killed *S. pneumoniae* **(b)** or *S. aureus* **(c)** for the indicated time were lysed and blotted with the indicated antibodies.
